# Supplementary material for: Integrated Microbiome and Metabolome Analysis Reveals a Positive Change in the Intestinal Environment of Myostatin Edited Large White Pigs
Source: PubMed Central journal article supplement (PMC7925633; doi:10.3389/fmicb.2021.628685), 2021-02-17
Supplement: Table_1.pdf [file Table_1.pdf]

**Supplementary Table S1.** The information of pigs.

|    | Gender | Breeds | Genotype | Father | Genotype | Breeds | Mother | Genotype | Breeds |
|----|--------|--------|----------|--------|----------|--------|--------|----------|--------|
| 1  | Male   | LW     | Heter    | 6302   | heter    | LW     | 2305   | WT       | LW     |
| 2  | Male   | LW     | Heter    | 6302   | heter    | LW     | 134612 | WT       | LW     |
| 3  | Male   | LW     | Heter    | 6302   | heter    | LW     | 3217   | WT       | LW     |
| 4  | Female | LW     | Heter    | 6302   | heter    | LW     | 2305   | WT       | LW     |
| 5  | Female | LW     | Heter    | 6302   | heter    | LW     | 2305   | WT       | LW     |
| 6  | Female | LW     | Heter    | 6302   | heter    | LW     | 3217   | WT       | LW     |
| 7  | Male   | LW     | WT       | 6302   | heter    | LW     | 3217   | WT       | LW     |
| 8  | Male   | LW     | WT       | 6302   | heter    | LW     | 3217   | WT       | LW     |
| 9  | Male   | LW     | WT       | 6302   | heter    | LW     | 3217   | WT       | LW     |
| 10 | Female | LW     | WT       | 6302   | heter    | LW     | 3217   | WT       | LW     |
| 11 | Female | LW     | WT       | 6302   | heter    | LW     | 2305   | WT       | LW     |
| 12 | Female | LW     | WT       | 6302   | heter    | LW     | 2305   | WT       | LW     |
