# Supplementary material for: Integrated Microbiome and Metabolome Analysis Reveals a Positive Change in the Intestinal Environment of Myostatin Edited Large White Pigs
Source: PubMed Central journal article supplement (PMC7925633; doi:10.3389/fmicb.2021.628685), 2021-02-17
Supplement: Table_2.pdf [file Table_2.pdf]

**Supplementary Table S2.** Composition and nutrient levels of the diets  
(%, as-fed basis)

| Calculated nutrient content | Percentage |
|-----------------------------|------------|
| Crude protein(%)            | 16         |
| Crude ash(%)                | 8          |
| Crude fiber (%)             | 1.98       |
| Calcium (%)                 | 0.6-0.9    |
| Phosphorus (%)              | 0.5        |
| Sodium chloride (%)         | 0.3-0.8    |
| Lysine (%)                  | 0.9        |
| Water (%)                   | 14         |
