# Supplementary material for: Integrated Microbiome and Metabolome Analysis Reveals a Positive Change in the Intestinal Environment of Myostatin Edited Large White Pigs
Source: PubMed Central journal article supplement (PMC7925633; doi:10.3389/fmicb.2021.628685), 2021-02-17
Supplement: Table_3.pdf [file Table_3.pdf]

**Supplementary Table S3.** The R2 and Q2 values for all mathematical models

| Mode | Comparison  | P-value R2 | P-value Q2 | R2        | Q2          |
|------|-------------|------------|------------|-----------|-------------|
| pos  | MSTN_J/WT_J | 0.55       | 0.03       | 0.8883379 | 0.274810551 |
| pos  | MSTN_C/WT_C | 0.25       | 0.015      | 0.9839648 | 0.353059477 |
| neg  | MSTN_J/WT_J | 0.52       | 0.125      | 0.9155766 | 0.034364683 |
| neg  | MSTN_C/WT_C | 0.11       | 0.015      | 0.9815042 | 0.388636497 |
